# Supplementary material for: The urinary metabolomic profile following the intake of meals supplemented with a cocoa extract in middle-aged obese subjects
Source: Royal Society of Chemistry journal article supplement (doi:10.1039/c5fo01191d), 2016-01-01
Supplement: c5fo01191d1.pdf [file c5fo01191d1.pdf]

**Supplemental table 1.** Other putative metabolites in negative ionization mode (ESI-)

| Baseline | Control 4 weeks | Cocoa 4 weeks | RT (min) | Detected mass (m/z) | Metabolite putative identification            | Assignment                                | Mass difference (mDa) |
|----------|-----------------|---------------|----------|---------------------|-----------------------------------------------|-------------------------------------------|-----------------------|
| nd       | 10.15           | 7.75          | 4.086    | 246.0463            | Phenylephrine 3-O-sulfate                     | [M-H] <sup>-</sup>                        | -2.1                  |
| 0.87     | 5.00            | 10.68         | 6.131    | 197.0678            | 5-Acetylamino-6-amino-3-methyluracil          | [M-H] <sup>-</sup>                        | 0.2                   |
| 13.25    | 5.71            | 8.89          | 6.367    | 232.0278            | Dopamine 4-O-sulfate                          | [M-H] <sup>-</sup>                        | 0.7                   |
|          |                 |               | 6.367    | 232.0278            | Dopamine 3-O-sulfate                          | [M-H] <sup>-</sup>                        | 0.7                   |
| 3.96     | 6.90            | 13.06         | 6.944    | 165.0424            | 7-Methylxanthine                              | [M-H] <sup>-</sup>                        | -0.6                  |
|          |                 |               | 6.944    | 165.0424            | 3-Methylxanthine                              | [M-H] <sup>-</sup>                        | -0.6                  |
| 1.21     | 11.55           | 8.55          | 7.971    | 261.0113            | 2,4-dichlorophenoxybutyric acid. methyl ester | [M-H] <sup>-</sup>                        | -2.2                  |
|          |                 |               | 7.971    | 261.0113            | phenylglycol 3-O-sulfate                      | [M+HCOO] <sup>-</sup> [-H <sub>2</sub> O] | -2.3                  |
|          |                 |               | 7.971    | 261.0113            | 4-Sulfobenzoate                               | [M+CH <sub>3</sub> COO] <sup>-</sup>      | -3.9                  |
| 2.20     | 10.66           | 6.96          | 8.267    | 375.1325            | Asp Trp Gly                                   | [M-H] <sup>-</sup>                        | -1.5                  |
|          |                 |               | 8.267    | 375.1325            | Riboflavin                                    | [M-H] <sup>-</sup>                        | -1.5                  |
|          |                 |               | 8.267    | 375.1325            | Asp Ile Trp                                   | [M-H] <sup>-</sup>                        | -1.5                  |
|          |                 |               | 8.267    | 375.1325            | Trp Asp Gly                                   | [M-H] <sup>-</sup>                        | -1.5                  |

|      |      |       |       |          |                                                                                                    |                                        |      |
|------|------|-------|-------|----------|----------------------------------------------------------------------------------------------------|----------------------------------------|------|
|      |      |       | 8.312 | 137.0244 | (2S,3S)-2,3-Dihydro-2,3-dihydroxybenzoate                                                          | [M-H] <sup>-</sup> [-H <sub>2</sub> O] | 0.0  |
|      |      |       | 8.312 | 137.0244 | 3-Methyl-cis,cis-hexadienedioate                                                                   | [M-H] <sup>-</sup> [-H <sub>2</sub> O] | 0.0  |
|      |      |       | 8.312 | 137.0244 | 3-Methylmuconolactone                                                                              | [M-H] <sup>-</sup> [-H <sub>2</sub> O] | -0.5 |
|      |      |       | 8.312 | 137.0244 | 4-Methylmuconolactone                                                                              | [M-H] <sup>-</sup> [-H <sub>2</sub> O] | -0.5 |
| 0.93 | 1.64 | 14.92 | 8.312 | 137.0244 | 1,6-Dihydroxycyclohexa-2,4-diene-1-carboxylate                                                     | [M-H] <sup>-</sup> [-H <sub>2</sub> O] | -0.5 |
|      |      |       | 8.312 | 137.0244 | 2-Hydroxy-6-keto-2,4-heptadienoate                                                                 | [M-H] <sup>-</sup> [-H <sub>2</sub> O] | -0.5 |
|      |      |       | 8.312 | 137.0244 | (1R,6S)-1.6-Di,hydroxycyclohexa-2,4-diene-1-carboxylate                                            | [M-H] <sup>-</sup> [-H <sub>2</sub> O] | -0.5 |
|      |      |       | 8.312 | 137.0244 | 2-Hydroxy-5-methyl-cis,cis-muconic semialdehyde                                                    | [M-H] <sup>-</sup> [-H <sub>2</sub> O] | -0.5 |
|      |      |       | 8.312 | 137.0244 | 4-Methyl-3-oxoadipate-enol-lactone                                                                 | [M-H] <sup>-</sup> [-H <sub>2</sub> O] | -0.5 |
| nd   | 2.50 | 16.16 | 8.317 | 216.9812 | 5-Sulfosalicylate                                                                                  | [M-H] <sup>-</sup>                     | 0.0  |
|      |      |       | 8.318 | 389.1019 | Ser-Tyr-OH                                                                                         | [M-H] <sup>-</sup>                     | -2.8 |
|      |      |       | 8.318 | 389.1019 | Tyr-Ser-OH                                                                                         | [M-H] <sup>-</sup>                     | -2.8 |
|      |      |       | 8.318 | 389.1019 | Dopaxanthin                                                                                        | [M-H] <sup>-</sup>                     | -2.8 |
| 2.09 | 6.59 | 11.50 | 8.318 | 389.1019 | 3,5-Pyridinedicarboxylic acid, 1,4-dihydro-2,6-dimethyl-4-(3-nitrophenyl)-carboxymethyl methyl est | [M-H] <sup>-</sup>                     | -2.8 |
|      |      |       | 8.318 | 389.1019 | Glabrescin                                                                                         | [M-H] <sup>-</sup> [-H <sub>2</sub> O] | 0.6  |

|      |       |      |       |          |                                                                |                                        |      |
|------|-------|------|-------|----------|----------------------------------------------------------------|----------------------------------------|------|
|      |       |      | 8.318 | 389.1019 | Dehydroamorphigenin                                            | [M-H] <sup>-</sup> [-H <sub>2</sub> O] | 0.6  |
|      |       |      | 8.318 | 389.1019 | Ferrugone                                                      | [M-H] <sup>-</sup> [-H <sub>2</sub> O] | 0.6  |
|      |       |      | 8.318 | 389.1019 | 5-Methoxydurmillone                                            | [M-H] <sup>-</sup> [-H <sub>2</sub> O] | 0.6  |
| 6.02 | 15.16 | 8.45 | 8.352 | 330.0318 | C <sub>13</sub> H <sub>9</sub> N <sub>5</sub> O <sub>4</sub> S | [M-H] <sup>-</sup>                     | -1.5 |
|      |       |      | 8.600 | 125.0240 | (E)-2-Methylglutaconic acid                                    | [M-H] <sup>-</sup> [-H <sub>2</sub> O] | -0.1 |
|      |       |      | 8.600 | 125.0240 | 3-hexenedioic acid                                             | [M-H] <sup>-</sup> [-H <sub>2</sub> O] | -0.1 |
|      |       |      | 8.600 | 125.0240 | 2,3-Dimethylmaleate                                            | [M-H] <sup>-</sup> [-H <sub>2</sub> O] | -0.1 |
|      |       |      | 8.600 | 125.0240 | (E)-3-methylglutaconic acid                                    | [M-H] <sup>-</sup> [-H <sub>2</sub> O] | -0.1 |
| 4.58 | 11.76 | 5.08 | 8.600 | 125.0240 | (E)-hex-2-enedioic acid                                        | [M-H] <sup>-</sup> [-H <sub>2</sub> O] | -0.1 |
|      |       |      | 8.600 | 125.0240 | 1,5-Anhydro-4-deoxy-D-glycero-hex-1-en-3-ulose                 | [M-H] <sup>-</sup> [-H <sub>2</sub> O] | -0.1 |
|      |       |      | 8.600 | 125.0240 | 1,5-Anhydro-4-deoxy-D-glycero-hex-3-en-2-ulose                 | [M-H] <sup>-</sup> [-H <sub>2</sub> O] | -0.1 |
|      |       |      | 8.600 | 125.0240 | Allylmalonic acid                                              | [M-H] <sup>-</sup> [-H <sub>2</sub> O] | -0.1 |
|      |       |      | 8.600 | 125.0240 | Methylitaconate                                                | [M-H] <sup>-</sup> [-H <sub>2</sub> O] | -0.1 |
| 0.40 | 9.94  | 3.36 | 8.681 | 273.0116 | C <sub>6</sub> H <sub>10</sub> O <sub>12</sub>                 | [M-H] <sup>-</sup>                     | -1.7 |
|      |       |      | 8.685 | 193.0506 | Scytalone                                                      | [M-H] <sup>-</sup>                     | -1.6 |

|       |      |       |       |          |                                           |                                           |      |
|-------|------|-------|-------|----------|-------------------------------------------|-------------------------------------------|------|
|       |      |       | 8.685 | 193.0506 | Isoferulic acid                           | [M-H] <sup>-</sup>                        | -1.6 |
|       |      |       | 8.685 | 193.0506 | Monoethyl phthalate                       | [M-H] <sup>-</sup>                        | -1.6 |
|       |      |       | 8.685 | 193.0506 | 5-Hydroxyconiferaldehyde                  | [M-H] <sup>-</sup>                        | -1.6 |
| 13.74 | 6.69 | 6.07  | 8.723 | 476.1172 | Isorhamnetin 7-alpha-D-Glucosamine        | [M-H] <sup>-</sup>                        | 2.7  |
|       |      |       | 8.107 | 415.1278 | Asp Asp Trp                               | [M-H] <sup>-</sup> [-H <sub>2</sub> O]    | -2.4 |
|       |      |       | 8.107 | 415.1278 | Trp Asp Asp                               | [M-H] <sup>-</sup> [-H <sub>2</sub> O]    | -2.4 |
|       |      |       | 8.107 | 415.1278 | Asp Trp Asp                               | [M-H] <sup>-</sup> [-H <sub>2</sub> O]    | -2.4 |
| nd    | 0.84 | 11.43 | 8.107 | 415.1278 | N5-Dinitrophenyl-L-ornithine methyl ester | [M+HCOO] <sup>-</sup> [-H <sub>2</sub> O] | -1.9 |
|       |      |       | 8.107 | 415.1278 | HoPhe-Phe-OH                              | [M-H] <sup>-</sup> [-H <sub>2</sub> O]    | 1.6  |
|       |      |       | 8.107 | 415.1278 | Phe-HoPhe-OH                              | [M-H] <sup>-</sup> [-H <sub>2</sub> O]    | 1.6  |

Abbreviations: nd, no detected; RT, retention time.

The following comparisons were p<0.01: baseline vs. control, baseline vs. cocoa and control vs. cocoa.

The data in baseline, control and cocoa columns refers to mean intensity of metabolites and are presented as log 2.
